# Supplementary material for: A Novel Computerized Cell Count Algorithm for Biofilm Analysis
Source: PubMed Central journal article supplement (PMC4858220; doi:10.1371/journal.pone.0154937), 2016-05-05
Supplement: pone.0154937.s005.pdf [file pone.0154937.s005.pdf]

**S1 Table. Correlation factors (*r*) of the curve progressions between the different parameters and methods.**

|                    | $N_{viable}$ | $A_{green}$ | $N_{dead}$ | $A_{red}$ | $Abs$ |
|--------------------|--------------|-------------|------------|-----------|-------|
| <b>Colistin</b>    |              |             |            |           |       |
| $A_{green}$        | 0.719        |             |            |           |       |
| $N_{dead}$         | -0.321       | /           |            |           |       |
| $A_{red}$          | /            | 0.391       | 0.999      |           |       |
| $Abs$              | 0.813        | 0.220       | /          | /         |       |
| CFU/mL             | 0.775        | 0.127       | /          | /         | 0.988 |
| <b>Nitroxoline</b> |              |             |            |           |       |
| $A_{green}$        | 0.998        |             |            |           |       |
| $N_{dead}$         | -0.703       | /           |            |           |       |
| $A_{red}$          | /            | -0.863      | 0.978      |           |       |
| $Abs$              | 0.998        | 0.997       | /          | /         |       |
| CFU/mL             | 0.844        | 0.866       | /          | /         | 0.828 |

$N_{viable}$  and  $A_{green}$  represent parameters of qBA and CFU/mL was determined on agar plates and  $Abs$  represents absorption of crystal violet staining. The correlation factors were determined from averaged values. Less useful correlations were not provided (crossed cells); CFU = colony forming units.
